# Supplementary material for: Impairment of Motor Function Correlates with Neurometabolite and Brain Iron Alterations in Parkinson’s Disease
Source: PubMed Central journal article supplement (PMC6406520; doi:10.3390/cells8020096), 2019-01-29
Supplement: cells-08-00096-s001.pdf [file cells-08-00096-s001.pdf]

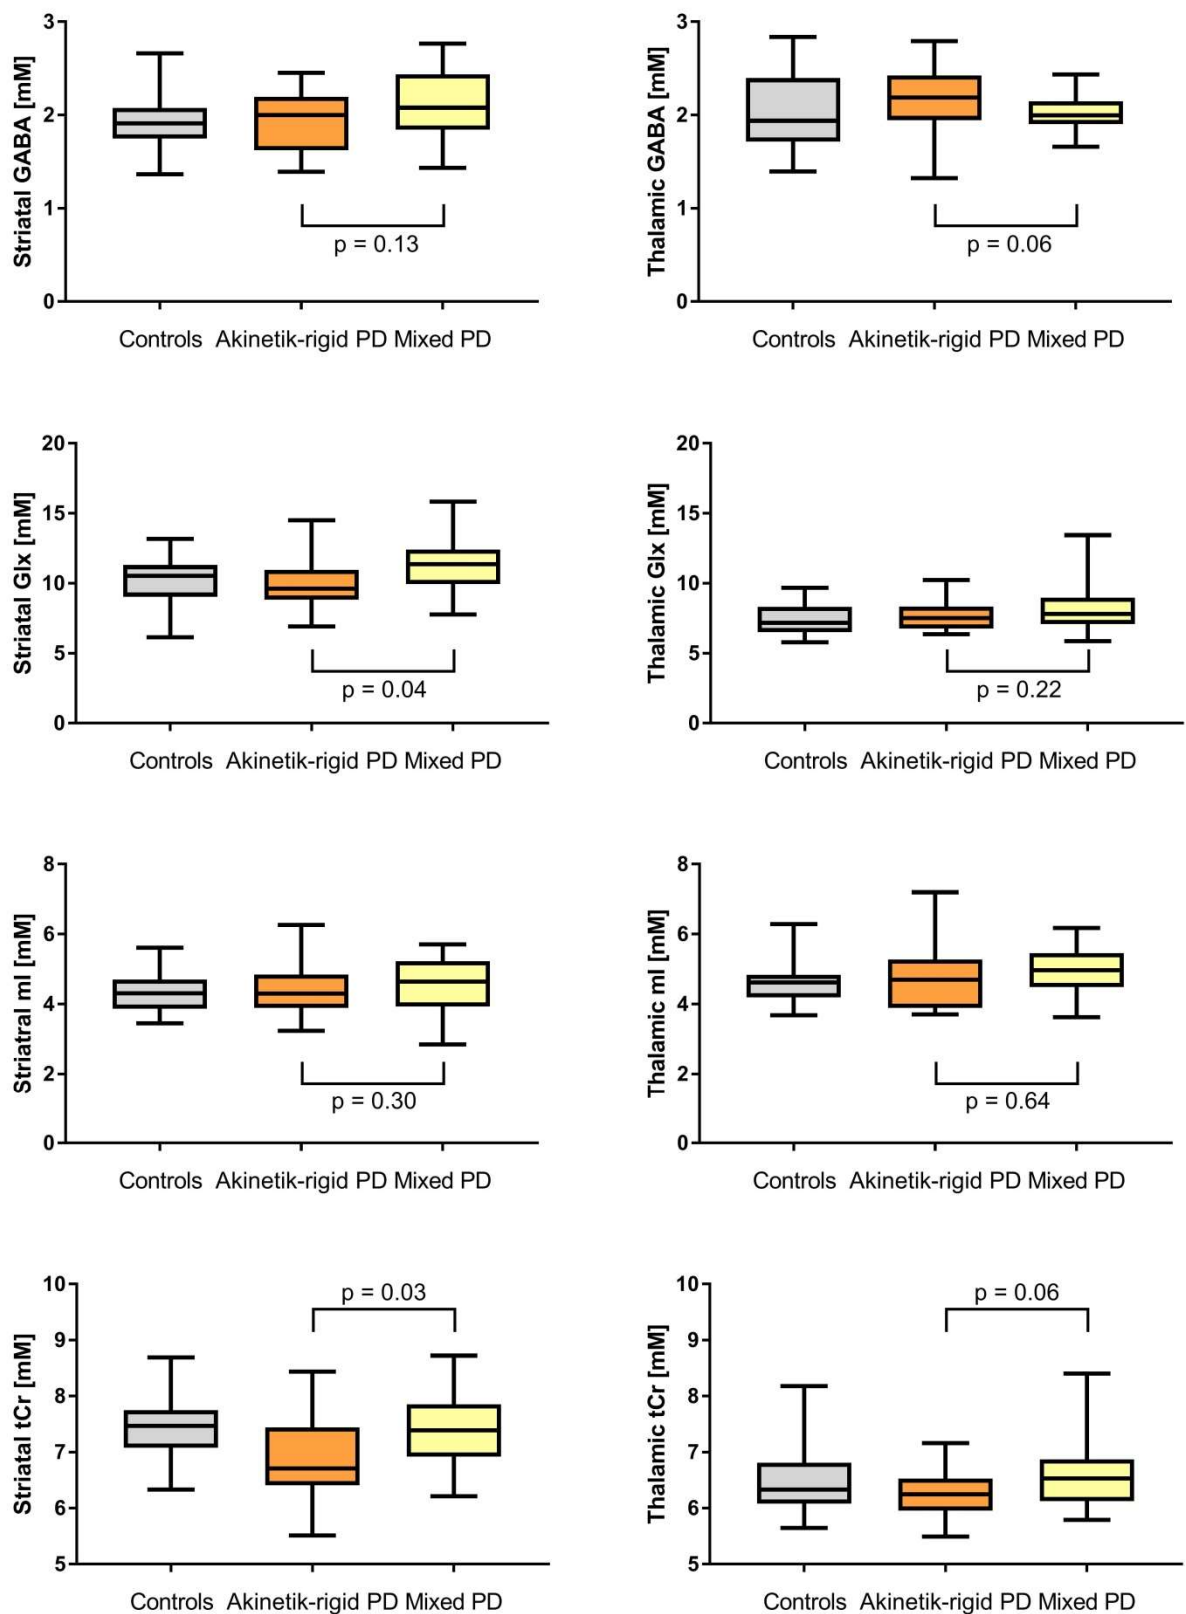

**Figure 1.** Box plots of the distributions of striatal and thalamic GABA, Glx, mI and tCr in 35 Parkinson patients and 35 controls. Abbreviations: GABA:  $\gamma$ -aminobutyric acid, Glx: glutamate and glutamine, mI: myo-inositol, tCr: total creatine, PD: Parkinson's disease, p value obtained by Kruskal-Wallis test.

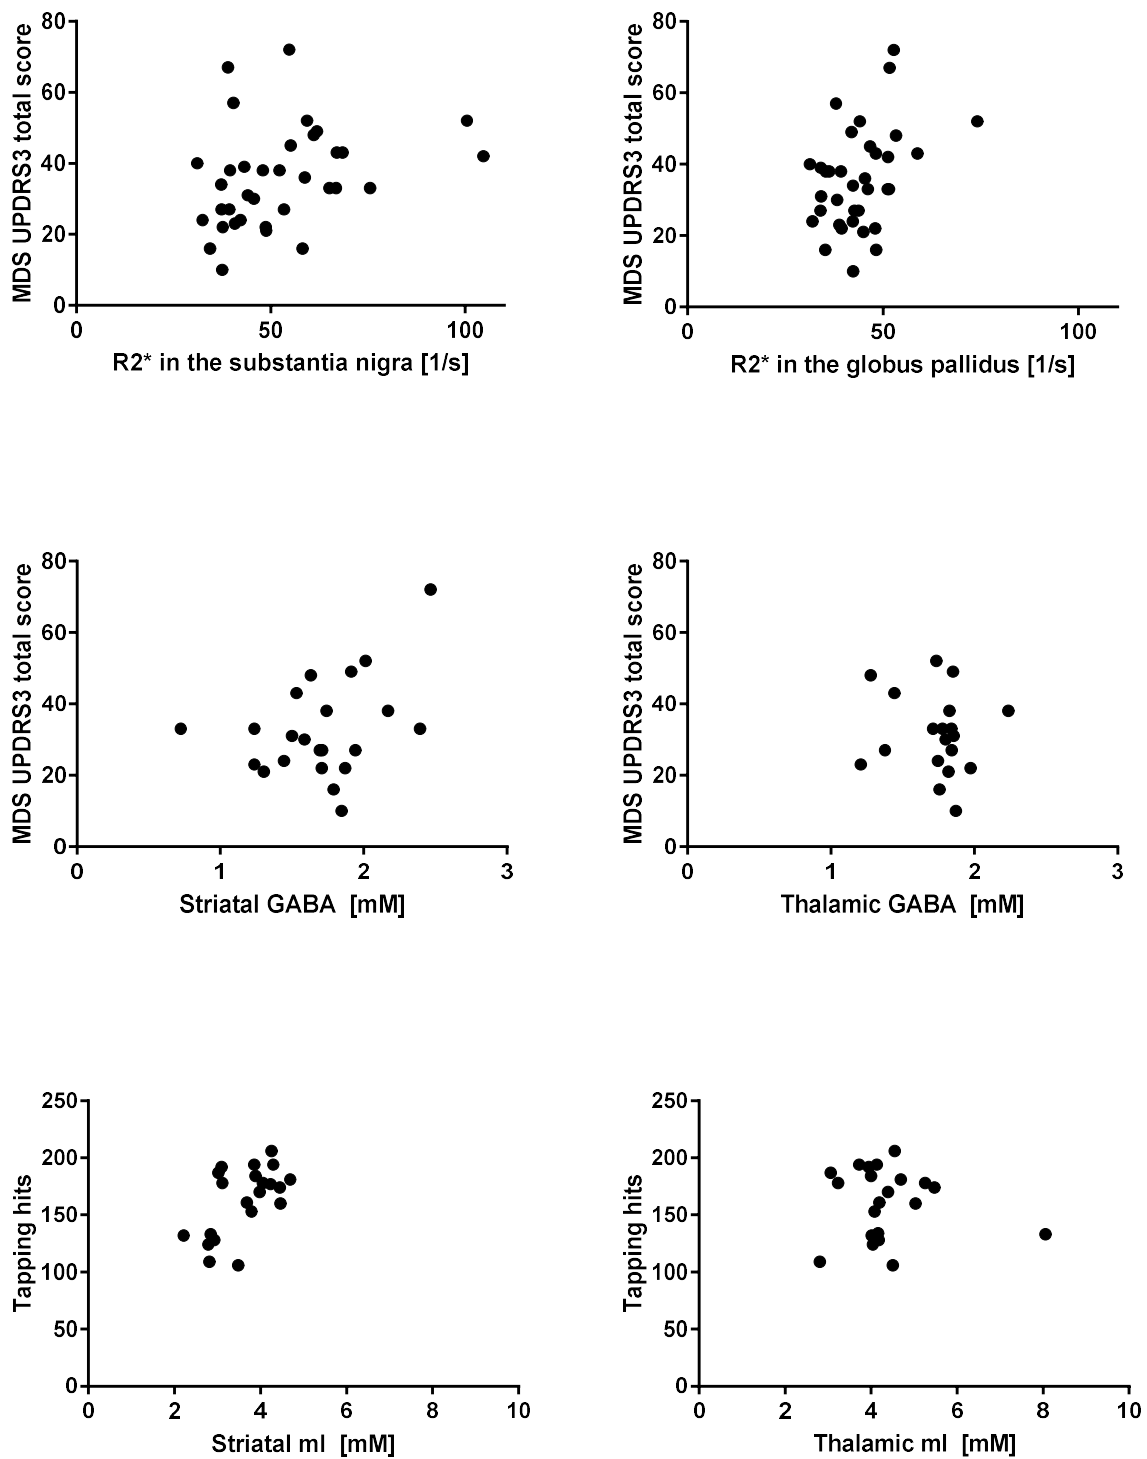

**Figure S2.** Correlations between brain iron ( $R2^*$  in ROIs placed in SN and GP) and GABA (in striatal and thalamic VOIs) with MDS-UPDRS3 total scores and of ml with tapping hits in 35 Parkinson patients. Abbreviations: MDS-UPDRS3: Movement Disorder Society-Sponsored Revision of the Unified Parkinson Disease Rating Scale part III, R: relaxation rate, GABA:  $\gamma$ -aminobutyric acid, Glx: glutamate and glutamine, ml: myo-inositol, tCr: total creatine.

**Table S1.** Fine motor test results for both hands presented with medians for tapping hits and tremor amplitude in Parkinson patients and controls.

|                                           |                     | N  | Tapping hits |       | Tremor amplitude [mm] |       | MDS-UPDRS3<br>total score | MDS-UPDRS3<br>rigidity subscore |
|-------------------------------------------|---------------------|----|--------------|-------|-----------------------|-------|---------------------------|---------------------------------|
|                                           |                     |    | Left         | Right | Left                  | Right | PD                        | PD                              |
| <b>Total</b>                              |                     | 70 | 181          | 198   | 0.97                  | 0.81  | 7.5                       | 1.5                             |
| <b>Group</b>                              | Parkinson patients  | 35 | 164          | 178   | 1.17                  | 0.92  | 34                        | 7                               |
|                                           | Controls            | 35 | 186          | 212   | 0.85                  | 0.77  | 1                         | 0                               |
| <b>Age</b>                                | ≤ 58 years (median) | 35 | 185          | 200   | 0.98                  | 0.82  | 27                        | 6                               |
|                                           | > 58 years          | 35 | 179          | 187   | 0.95                  | 0.81  | 38.5                      | 7                               |
| <b>Education</b>                          | Low                 | 25 | 166          | 186   | 1.10                  | 0.87  | 39                        | 7                               |
|                                           | Medium              | 14 | 181          | 195   | 0.99                  | 0.83  | 30.5                      | 6                               |
|                                           | High                | 31 | 194          | 203   | 0.82                  | 0.81  | 35.5                      | 4.5                             |
| <b>PD subtype</b>                         | Mixed               | 16 | 169          | 178   | 1.21                  | 1.04  | 34.5                      | 4                               |
|                                           | Akinetic-rigid      | 19 | 164          | 182   | 1.12                  | 0.89  | 34                        | 7                               |
| <b>Clinically more affected side (PD)</b> | Left                | 12 | 166          | 184   | 1.49                  | 0.91  | 29                        | 5.5                             |
|                                           | Right               | 14 | 171          | 176   | 0.81                  | 0.83  | 31.5                      | 5                               |
|                                           | No preference       | 9  | 153          | 182   | 1.23                  | 1.06  | 43                        | 7                               |

Abbreviations: PD, Parkinson's disease, MDS-UPDRS3: Movement Disorder Society-Sponsored Revision of the Unified Parkinson Disease Rating Scale part III.

**Table S2.** Spearman correlation coefficients with 95% confidence interval between motor functions in 35 Parkinson patients.

|                              | Tapping hits |        |      | Tremor amplitude [mm] |        |      | MDS-UPDRS3 total score |             |             |
|------------------------------|--------------|--------|------|-----------------------|--------|------|------------------------|-------------|-------------|
|                              | rs           | 95% CI |      | rs                    | 95% CI |      | rs                     | 95% CI      |             |
| Tremor amplitude [mm]        | -0.32        | -0.59  | 0.02 |                       |        |      |                        |             |             |
| MDS-UPDRS3 total score       | 0.08         | -0.26  | 0.40 | 0.02                  | -0.31  | 0.35 |                        |             |             |
| MDS-UPDRS3 rigidity subscore | 0.14         | -0.20  | 0.45 | -0.13                 | -0.44  | 0.21 | <b>0.78</b>            | <b>0.61</b> | <b>0.89</b> |

Abbreviations: PD: Parkinson's disease, MDS-UPDRS3: Movement Disorder Society-Sponsored Revision of the Unified Parkinson Disease Rating Scale part III, rs: Spearman correlation coefficient, CI: confidence interval.
